# Supplementary material for: Effectiveness of COVID-19 Vaccines in Adults with Diabetes Mellitus: A Systematic Review
Source: MDPI journal article supplement (doi:10.3390/vaccines11010024), 2022-12-22
Supplement: s1 [file s1]

## Supplementary Materials

Table S1. Search strategy in PubMed.

| Search | Query                                                                                                                                                                                                                                                                                                                                                           | Results   |
|--------|-----------------------------------------------------------------------------------------------------------------------------------------------------------------------------------------------------------------------------------------------------------------------------------------------------------------------------------------------------------------|-----------|
| #4     | #1 AND (#2 OR #3)                                                                                                                                                                                                                                                                                                                                               | 1,450     |
| #3     | "Comorbidity"[Mesh] OR Comorbidit*[tiab] OR "Co morbidit*[tiab] OR "underlying dis*[tiab] OR "co existing dis*[tiab] OR "co occurring dis*[tiab] OR "concurrent dis*[tiab] OR "underlying condition*[tiab] OR "co-existing condition*[tiab] OR "co-occurring condition*[tiab] OR "concurrent condition*[tiab] OR Multimorbidit*[tiab] OR "Multi morbidit*[tiab] | 297,875   |
| #2     | "Diabetes Mellitus"[Mesh] OR "Hypoglycemic Agents"[Mesh] OR "Hypoglycemic Agents" [Pharmacological Action] OR Prediabete*[tw] OR diabetes[tw] OR NIDDM[tw] OR IDDM[tw] OR T1DM[tw] OR T2DM[tw] OR diabetic*[tw] OR insulin*[tw] OR metformin*[tw] OR rosiglitazon*[tw] OR troglitazon*[tw] OR pioglitazon*[tw] OR hypoglycem*[tw] OR hypoglycaem*[tw]           | 1,082,697 |
| #1     | "COVID-19 Vaccines"[Mesh] OR ( (Covid*[tw] OR corona*[tw] OR ncov[tw] OR "SARS CoV"[tw] OR SARSCoV*[tw] OR Coronavirus[tw] OR Pfizer[tw] OR comirnaty[tw] OR spikevax[tw] OR moderna[tw] OR "mRNA 1273"[tw] OR "Ad26.COV*[tw] OR Janssen[tw] OR Johnson[tw] OR 78436735*[tw] OR BNT162*[tw]) AND (vaccin*[tw]) )                                                | 31,885    |

Table S2: Search strategy in Embase.com.

| Search | Query                                                                                                                                                                                                                                                                                                      | Results   |
|--------|------------------------------------------------------------------------------------------------------------------------------------------------------------------------------------------------------------------------------------------------------------------------------------------------------------|-----------|
| #5     | #4 NOT ('chapter'/it OR 'conference abstract'/it OR 'conference paper'/it OR 'conference review'/it OR 'editorial'/it OR 'erratum'/it OR 'letter'/it OR 'note'/it OR 'review'/it OR 'short survey'/it)                                                                                                     | 1,301     |
| #4     | #1 AND (#2 OR #3)                                                                                                                                                                                                                                                                                          | 2,516     |
| #3     | 'comorbidity'/exp OR (Comorbidit* OR 'Co morbidit*' OR 'underlying dis*' OR 'co existing dis*' OR 'co occurring dis*' OR 'concurrent dis*' OR 'underlying condition*' OR 'co-existing condition*' OR 'co-occurring condition*' OR 'concurrent condition*' OR Multimorbidit* OR 'Multi morbidit*'):ti,ab,kw | 522,745   |
| #2     | 'diabetes mellitus'/exp OR 'antidiabetic agent'/exp OR (Prediabet* OR diabetes OR NIDDM OR IDDM OR T1DM OR T2DM OR diabetic* OR insulin* OR metformin* OR rosiglitazon* OR troglitazon* OR pioglitazon* OR hypoglycem* OR hypoglycaem*):ti,ab,kw                                                           | 1,721,381 |
| #1     | 'SARS-CoV-2 vaccine'/exp OR ((Covid* OR corona* OR ncov OR 'SARS CoV' OR SARSCoV* OR Coronavirus OR Pfizer OR comirnaty OR spikevax OR moderna OR 'mRNA 1273' OR 'Ad26.COV*' OR Janssen OR Johnson OR 78436735* OR BNT162*) AND (vaccin*)):ti,ab,kw                                                        | 33,038    |

Table S3: Search strategy in Clarivate Analytics/Web of Science Core Collection.

| Search | Query                                                                                                                                                                                                                                                                           | Results   |
|--------|---------------------------------------------------------------------------------------------------------------------------------------------------------------------------------------------------------------------------------------------------------------------------------|-----------|
| #4     | #1 AND (#2 OR #3)                                                                                                                                                                                                                                                               | 1,187     |
| #3     | TS=(Comorbidit* OR "Co morbidit*" OR "underlying dis*" OR "co existing dis*" OR "co occurring dis*" OR "concurrent dis*" OR "underlying condition*" OR "co-existing condition*" OR "co-occurring condition*" OR "concurrent condition*" OR Multimorbidit* OR "Multi morbidit*") | 251,769   |
| #2     | TS=(Prediabete* OR diabetes OR NIDDM OR IDDM OR T1DM OR T2DM OR diabetic* OR insulin* OR metformin* OR rosiglitazon* OR troglitazon* OR pioglitazon* OR hypoglycem* OR hypoglycaem*)                                                                                            | 1,216,530 |
| #1     | TS=((Covid* OR corona* OR ncov OR "SARS CoV" OR SARSCoV* OR Coronavirus OR Pfizer OR comirnaty OR spikevax OR moderna OR "mRNA 1273" OR "Ad26.COV*" OR Janssen OR Johnson OR 78436735* OR BNT162*) AND (vaccin*))                                                               | 28,036    |

Table S4: Search strategy in Wiley/Cochrane Library.

| Search | Query                                                                                                                                                                                                                                                                                                                                   | Results |
|--------|-----------------------------------------------------------------------------------------------------------------------------------------------------------------------------------------------------------------------------------------------------------------------------------------------------------------------------------------|---------|
| #4     | #1 AND (#2 OR #3)                                                                                                                                                                                                                                                                                                                       | 110     |
| #3     | (Comorbidit* OR "Co NEXT morbidit*" OR "underlying NEXT dis*" OR "co existing NEXT dis*" OR "co occurring NEXT dis*" OR "concurrent NEXT dis*" OR "underlying NEXT condition*" OR "co-existing NEXT condition*" OR "co-occurring NEXT condition*" OR "concurrent NEXT condition*" OR Multimorbidit* OR "Multi NEXT morbidit*"):ti,ab,kw | 22,363  |
| #2     | (Prediabet* OR diabetes OR NIDDM OR IDDM OR T1DM OR T2DM OR diabetic* OR insulin* OR metformin* OR rosiglitazon* OR troglitazon* OR pioglitazon* OR hypoglycem* OR hypoglycaem*):ti,ab,kw                                                                                                                                               | 131,680 |
| #1     | ((Covid* OR corona* OR ncov OR "SARS NEXT CoV" OR SARSCoV* OR Coronavirus OR Pfizer OR comirnaty OR spikevax OR moderna OR "mRNA NEXT 1273" OR "Ad26.COV*" OR Janssen OR Johnson OR 78436735* OR BNT162*) AND (vaccin*)):ti,ab,kw                                                                                                       | 1,402   |

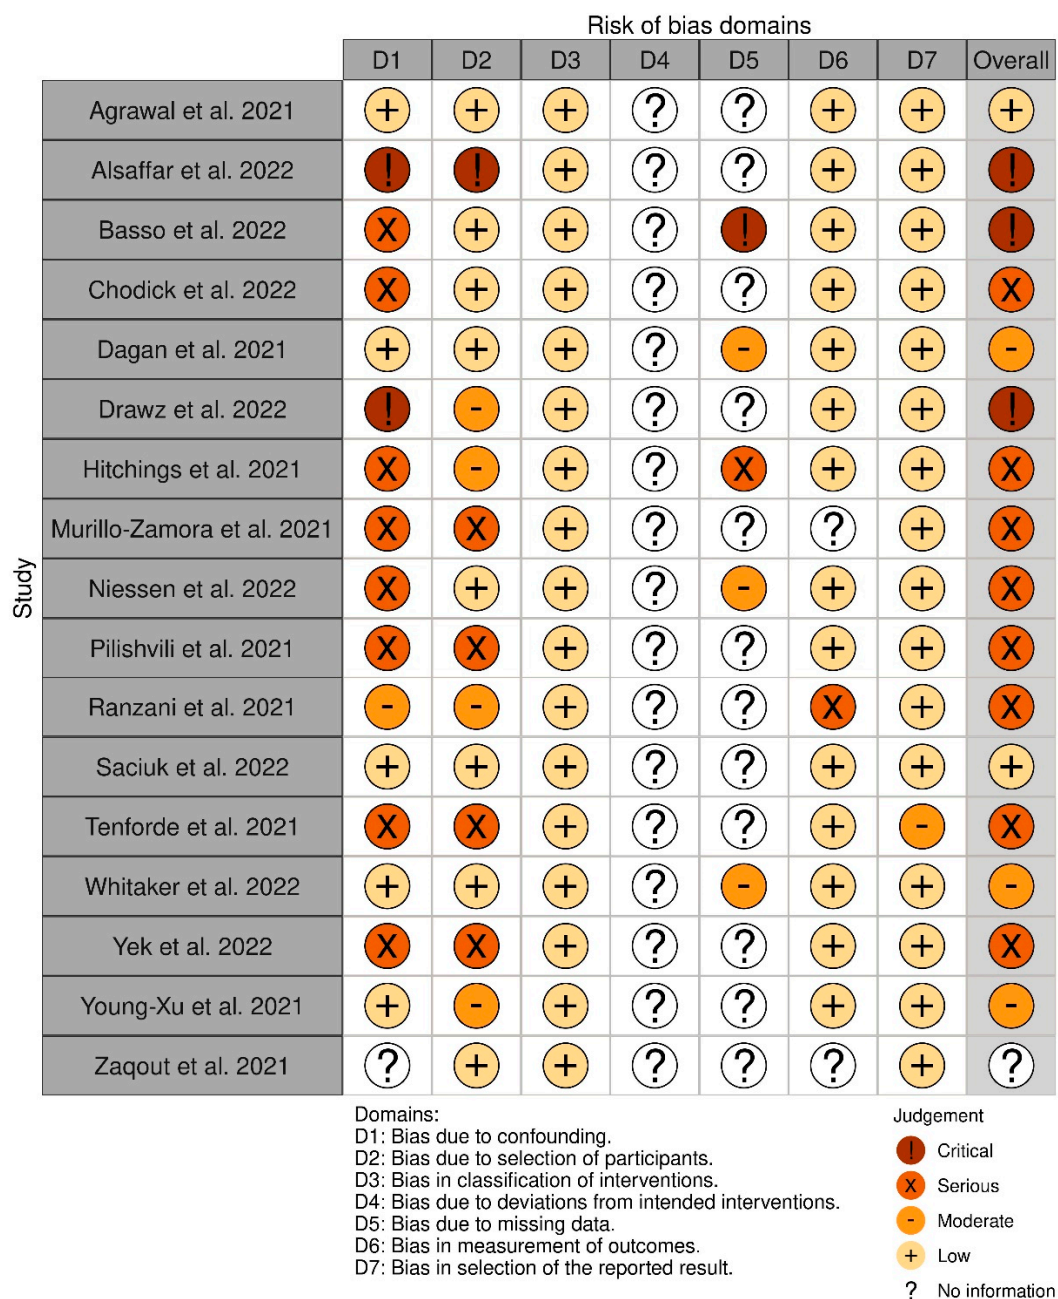

Figure S1. Risk of bias by domain and overall, for each study separately.

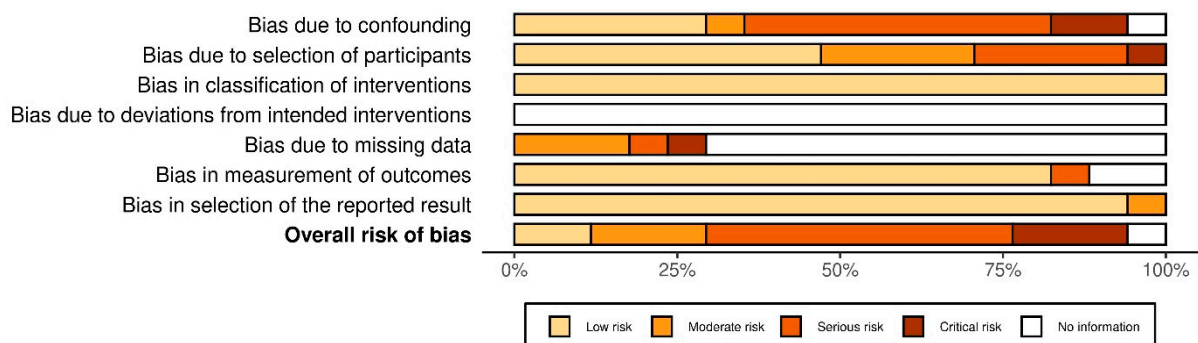

Figure S2. Risk of bias in included studies, by domain and overall.
